# Supplementary material for: [99mTc]Tc-DTPA-Bis(cholineethylamine) as an Oncologic Tracer for the Detection of Choline Transporter (ChT) and Choline Kinase (ChK) Expression in Cancer
Source: PubMed Central journal article supplement — ACS Omega. 2022 Apr 8;7(15):12509–23. doi: 10.1021/acsomega.1c04256 (PMC9025991; doi:10.1021/acsomega.1c04256), 2022-04-08
Supplement: ao1c04256_si_001.pdf [file ao1c04256_si_001.pdf]

# **[<sup>99m</sup>Tc]Tc-DTPA-bis(Cholineethylamine) as an Oncologic Tracer for Detection of Choline Transporter (ChT) and Choline Kinase (ChK) Expression in Cancer**

Ambika Parmar Jaswal<sup>a1</sup>, Puja Panwar Hazari<sup>a\*</sup>, Surbhi Prakash<sup>a</sup>, Pallavi Sethi<sup>a</sup>, Aruna Kaushik<sup>b</sup>, Bal G. Roy<sup>c</sup>, Swati Kathait<sup>a</sup>, Baljinder Singh<sup>d</sup>, and Anil Kumar Mishra<sup>a\*</sup>

<sup>a</sup>*Division of Cyclotron and Radiopharmaceutical Sciences, Institute of Nuclear Medicine and Allied Sciences, Brig S.K. Mazumdar Road, Delhi, India.*

<sup>b</sup>*Department of Nuclear Medicine, Institute of Nuclear Medicine and Allied Sciences, Brig S.K. Mazumdar Road, Delhi, India.*

<sup>c</sup>*Experimental Animal Facility, Institute of Nuclear Medicine and Allied Sciences, Brig S.K. Mazumdar Road, Delhi, India.*

<sup>d</sup>*Post Graduate Institute of Medical Education & Research, Chandigarh.*

Corresponding Authors:

**Dr Puja Panwar Hazari**

Brig. S. K. Mazumdar Road, Delhi-110054, India

Phone: +91-11-23984480 Fax: +91-11-2391-9509

E-mail: puja.hazari@gmail.com

**Dr Anil Kumar Mishra**

Brig. S. K. Mazumdar Road, Delhi-110054, India

Phone: +91-11-23984480 Fax: +91-11-2391-9509

akmishra63@gmail.com

## List of Contents

### Characterization data

- S1 <sup>1</sup>H Spectrum of 2-(dimethylamino)ethylacetate
- S2 <sup>13</sup>C Spectrum of 2-(dimethylamino)ethylacetate
- S3 Mass Spectrum of 2-(dimethylamino)ethylacetate
- S4 <sup>1</sup>H spectrum of 2-acetoxy-N-(2-aminoethyl)-N, N-dimethylethanaminium
- S5 Mass spectrum of 2-acetoxy-N-(2-aminoethyl) N, N-dimethylethanaminium
- S6 <sup>1</sup>H Spectrum of 2-amino-N-(2-hydroxyethyl)-N, N-dimethylethanaminium
- S7 <sup>13</sup>C Spectrum of 2-amino-N-(2-hydroxyethyl)-N, N-dimethylethanaminium
- S8 Mass Spectrum of 2-amino-N-(2-hydroxyethyl)-N, N-dimethylethanaminium
- S9 <sup>1</sup>H Spectrum of 6,9,12-tris(carboxymethyl)-N1,N17-bis(2-hydroxyethyl)-N1,N1,N17,N17-tetramethyl-4,14-dioxo-3,6,9,12,15-pentaazaheptadecane-1,17-diaminium [DTPA-bis(ChoEA)]
- S10 <sup>13</sup>C Spectrum of 6,9,12-tris(carboxymethyl)-N1,N17-bis(2-hydroxyethyl)-N1,N1,N17,N17-tetramethyl-4,14-dioxo-3,6,9,12,15-pentaazaheptadecane-1,17-diaminium. [DTPA-bis(ChoEA)]
- S11 Mass Spectra of 6,9,12-tris(carboxymethyl)-N1,N17-bis(2-hydroxyethyl)-N1,N1,N17,N17-tetramethyl-4,14-dioxo-3,6,9,12,15-pentaazaheptadecane-1,17-diaminium a) LCMS Spectrum b) HRAMS Spectrum HRAMS spectrum of Re-DTPA-bis(ChoEA)
- S12 IR spectra of a) DTPA-bis(ChoEA) b)Re-DTPA-bis(ChoEA) complex c) Overlay of IR Spectra
- Table S1 Table showing calculated and observed mass in HRMS spectra of plausible Re-DTPA-bis(ChoEA) Complex.

### Methods

- S13 *In vitro* toxicity studies
- a. Radiolabeling and Serum stability
- S14 Radiochromatogram showing formation of single species.
- S15 Serum stability of [<sup>99m</sup>Tc]Tc-DTPA-bis(ChoEA) (A) human serum (B) PBS
- b. In Silico docking studies

Table S2 : Table showing Glide Score and corresponding interactions of DTPA- Choline, Fluoroethylcholine, [ $^{99m}\text{Tc}$ ]Tc-DTPA-bis(ChoEA), and Choline.

S16 3D Structure of choline kinase alpha (RCSB PDB:2ckq)

S17 Bar graph showing variation in animal weight with respect to varying concentrations of DTPA-bis(ChoEA) over a period of 4 weeks

Table S3. Table showing Tumor to muscle, Tumor to blood, Tumor to Liver values from PC3, A549, HCT116 imaging studies calculated by semiquantitative analysis of MicroSPECT images.

S19 First in-human study of [ $^{99m}\text{Tc}$ ]Tc-DTPA-bis(ChoEA)

## Characterization data

Figure S1:  $^1\text{H}$  Spectrum of 2-(dimethylamino)ethylacetate

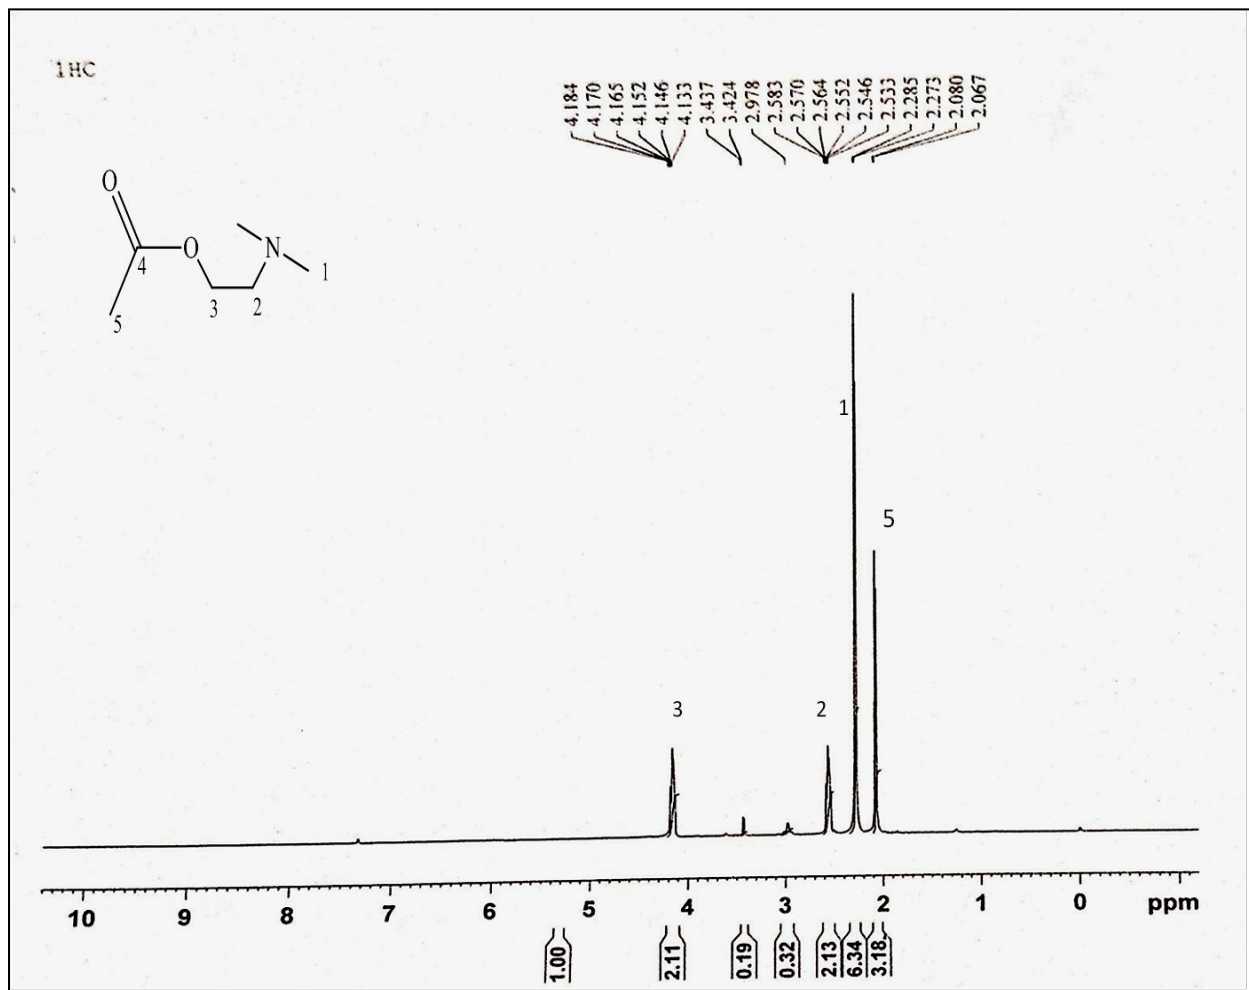

Step 1:  $^1\text{H}$ NMR (400 MHz,  $\text{CDCl}_3$ )  $\delta$  (ppm): 2.06 (s, 3H,  $-\text{CH}_3$ ), 2.28 (s, 6H,  $-\text{N}(\text{CH}_3)_2$ ), 2.56 (t, 2H,  $-\text{CH}_2-$ ), 4.15 (t, 2H,  $-\text{CH}_2-$ ).

Figure S2 :  $^{13}\text{C}$  Spectrum of 2-(dimethylamino)ethylacetate

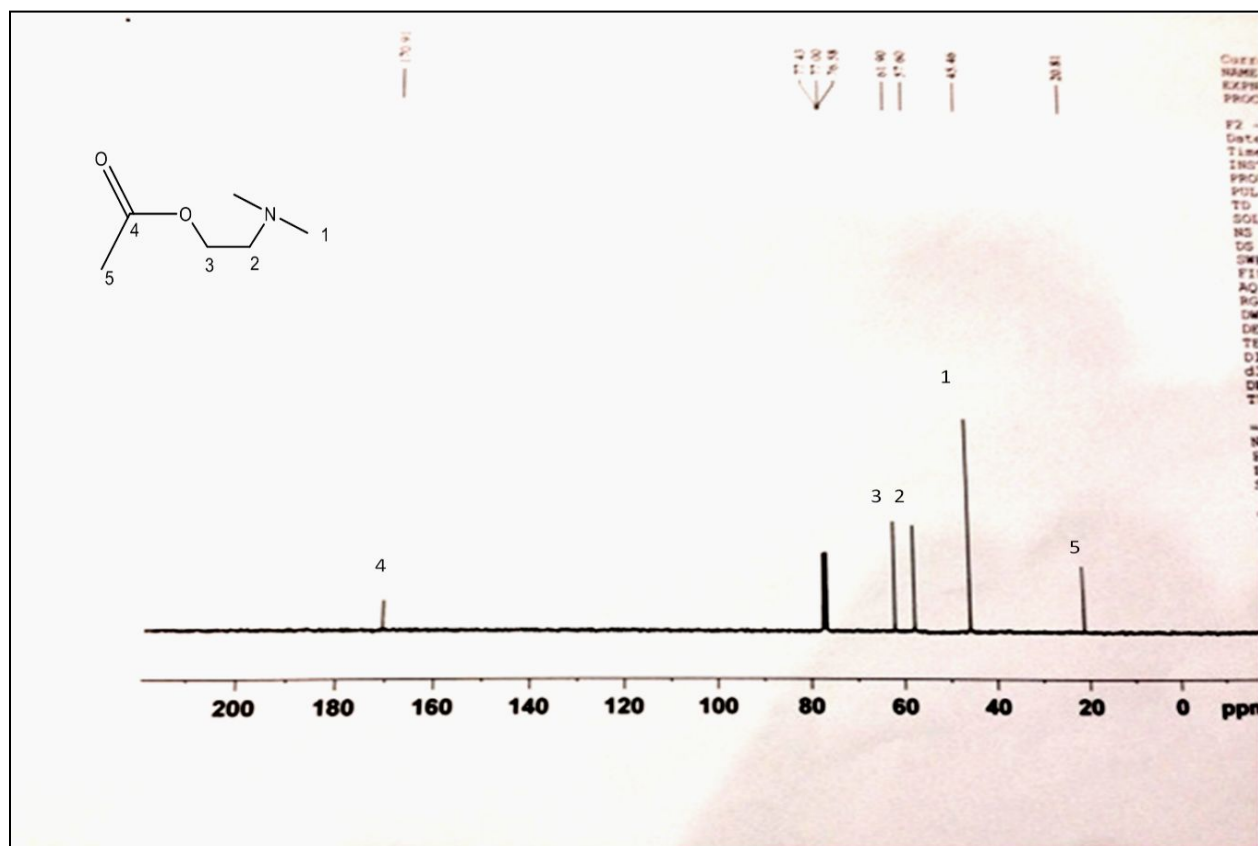

Step1:  $^{13}\text{C}$  NMR (100 MHz,  $\text{CDCl}_3$ )  $\delta$  (ppm): 20.81 ( $-\text{CH}_3$ ), 45.40 ( $-\text{N}(\text{CH}_3)_2$ ), 57.60 ( $-\text{CH}_2-$ ), 61.90 ( $-\text{CH}_2-$ ), 170.91 ( $-\text{CO}-$ ).

**Figure S3: Mass Spectrum of 2-(dimethylamino)ethylacetate**

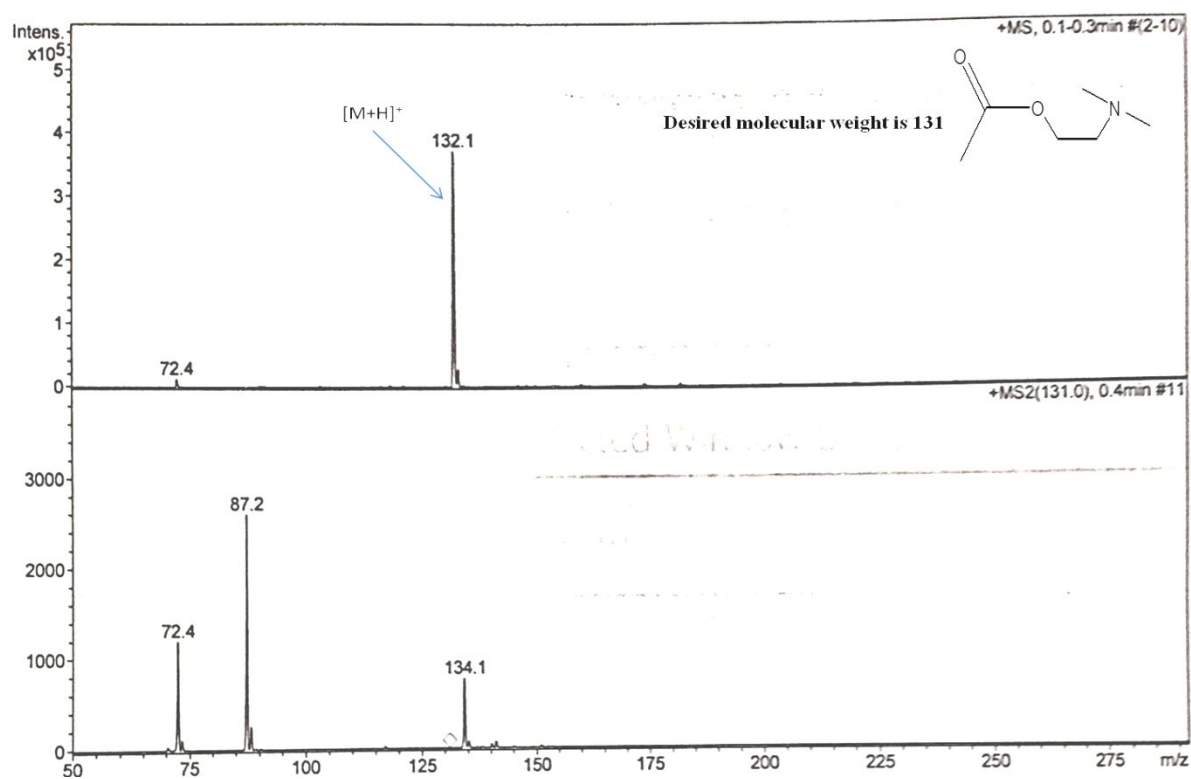

Step1:ESI-MS (m/z):  $C_6H_{14}NO_2$  : 131 Found 132.1 [M+H]<sup>+</sup>.

Figure S4:  $^1\text{H}$  spectrum of 2-acetoxy-N-(2-aminoethyl)-N,N-dimethylethanaminium

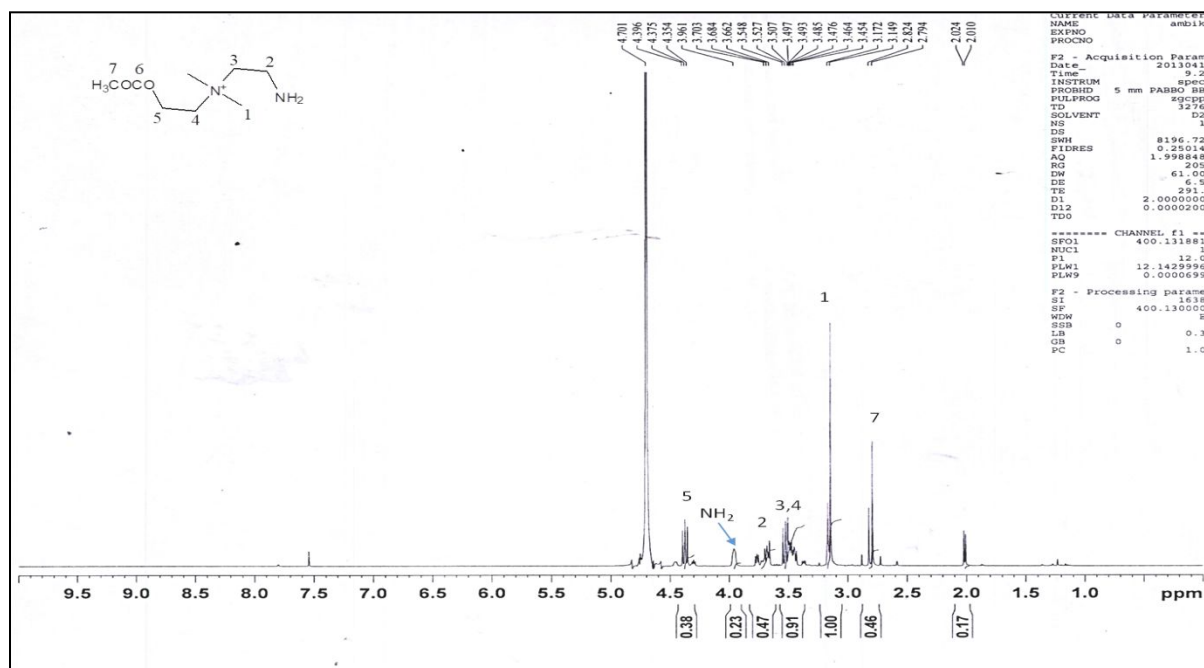

Step2:  $^1\text{H}$ NMR (400 MHz,  $\text{CDCl}_3$ )  $\delta$  (ppm) : 2.8 (s, 3H,  $\text{COOCH}_3$ ), 3.17 (s, 6H,  $-\text{N}^+(\text{CH}_3)_2$ ), 3.49 (m, 4H,  $2\times\text{-CH}_2\text{-}$ ), 3.54 (t, 2H,  $-\text{CH}_2\text{-NH}_2$ ), 3.96 (brs, 2H,  $-\text{NH}_2$ ), 4.35 (t, 2H,  $-\text{CH}_2\text{-}$ )

**Figure S5: Mass spectrum of Synthesis of 2-acetoxy-N-(2-aminoethyl)-N,N-dimethylethanaminium**

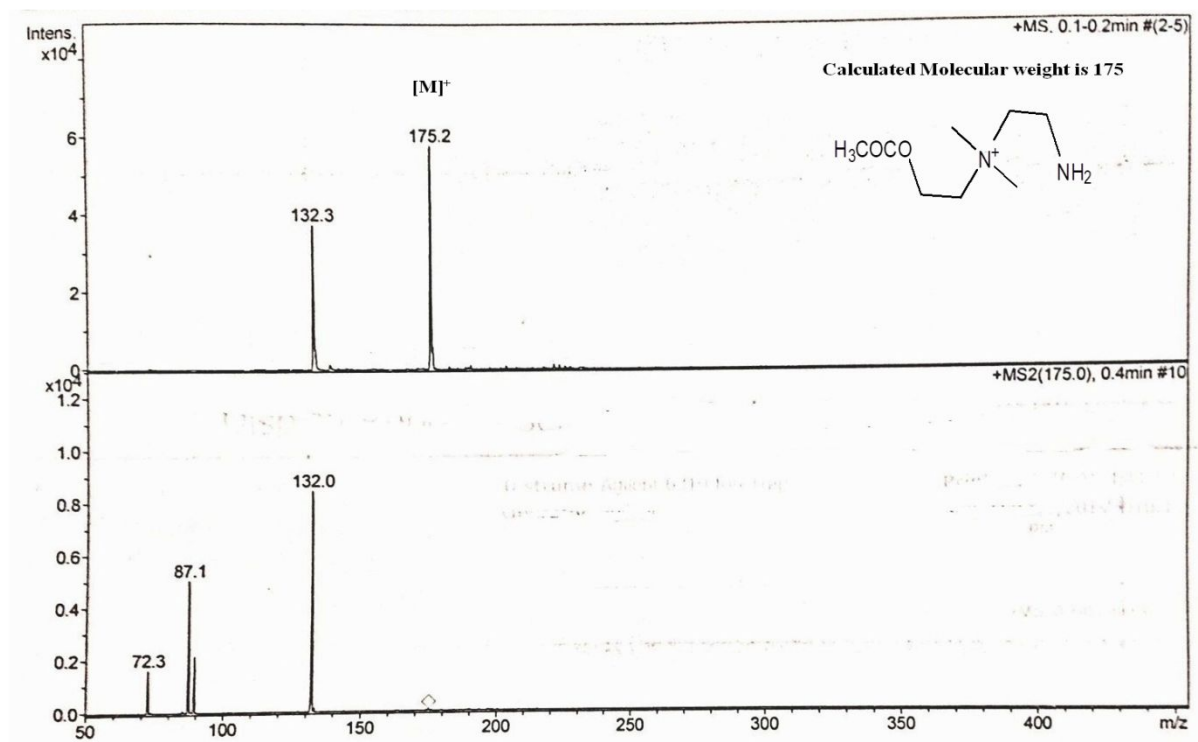

FigureS6:  $^1\text{H}$  Spectrum of 2-amino-N-(2-hydroxyethyl)-N, N-dimethylethanaminium

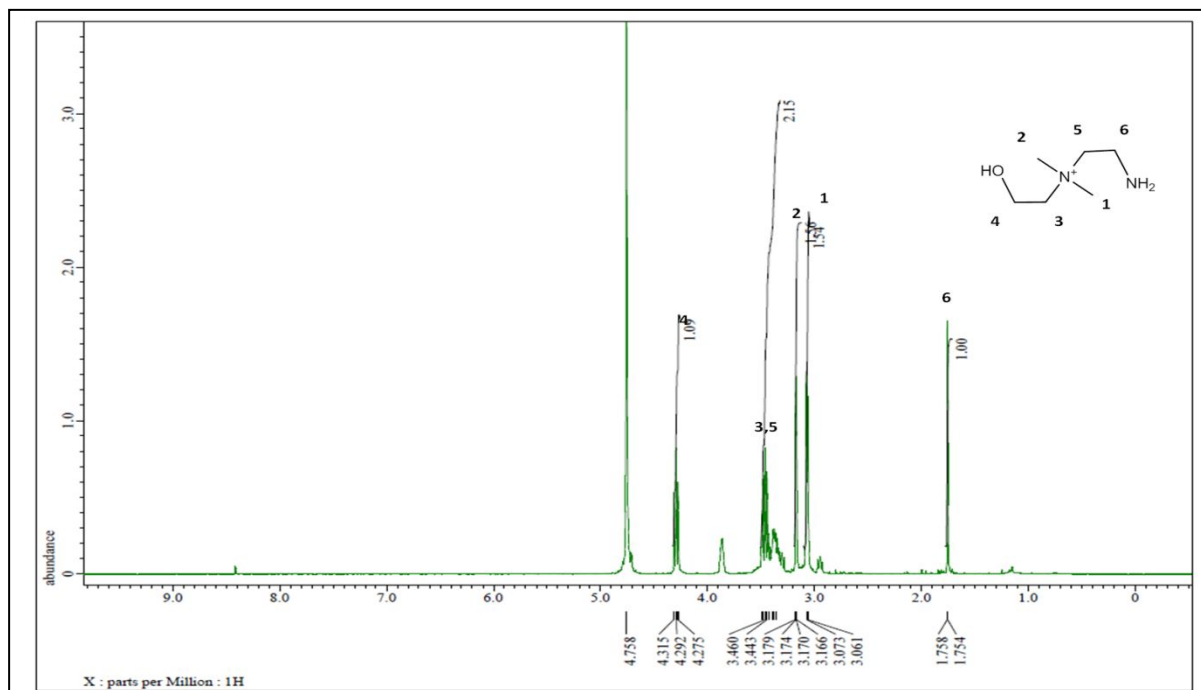

Step3:  $^1\text{H}$ NMR (400 MHz,  $\text{CDCl}_3$ )  $\delta$  (ppm): 1.71 (s, 2H,  $-\text{CH}_2\text{-NH}_2$ ), 3.06 (s, 3H,  $-\text{N}^+$  ( $\text{CH}_3$ )),

3.17 (3H,  $-\text{N}^+$  ( $\text{CH}_3$ )), 3.4-3.6 (m, 4H,  $2\times -\text{CH}_2-$ ), 3.78 (brs, 2H,  $-\text{NH}_2$ ), 4.3 (T, 2H,  $-\text{CH}_2-$ ).

Figure S7:  $^{13}\text{C}$  Spectrum of 2-amino-N-(2-hydroxyethyl)-N, N-dimethylethanaminium

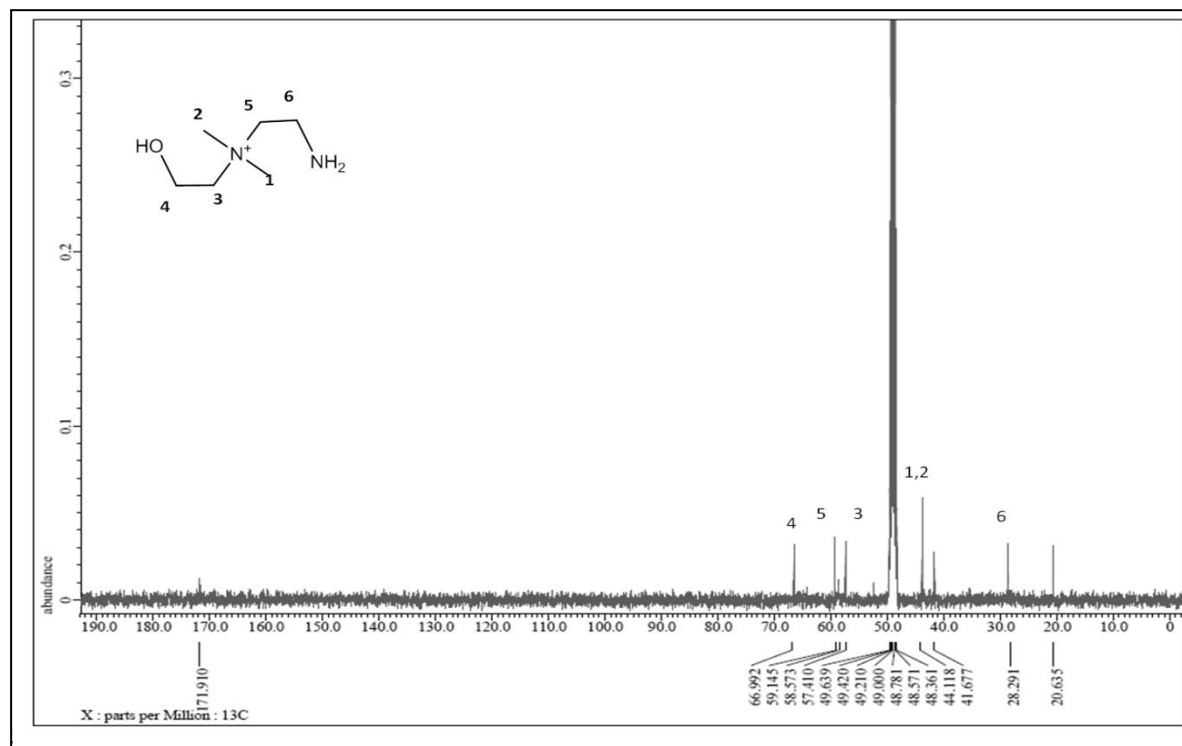

59.2 (-CH<sub>2</sub>-), 66.3 (-CH<sub>2</sub>-).

**FigureS8 : Mass Spectrum of 2-amino-N-(2-hydroxyethyl)-N, N-dimethylethanaminium**

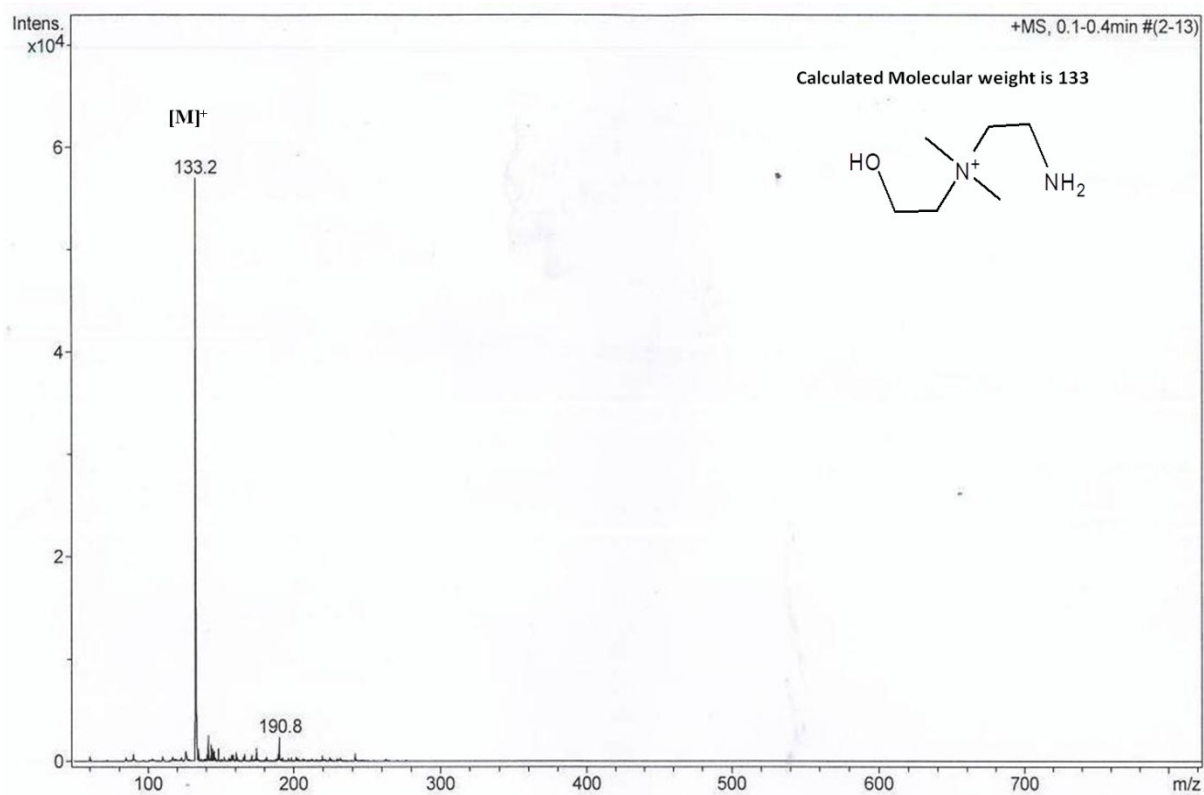

Step3: ESI-MS (m/z): C<sub>6</sub>H<sub>17</sub>N<sub>2</sub>O<sup>+</sup>: calculated mass: 133; Found at 133.2 [M]<sup>+</sup>

FigureS9:  $^1\text{H}$  Spectrum of 6,9,12-tris(carboxymethyl)-N1,N17-bis(2-hydroxyethyl)-N1,N1,N17,N17-tetramethyl-4,14-dioxo-3,6,9,12,15-pentaazaheptadecane-1,17-diaminium

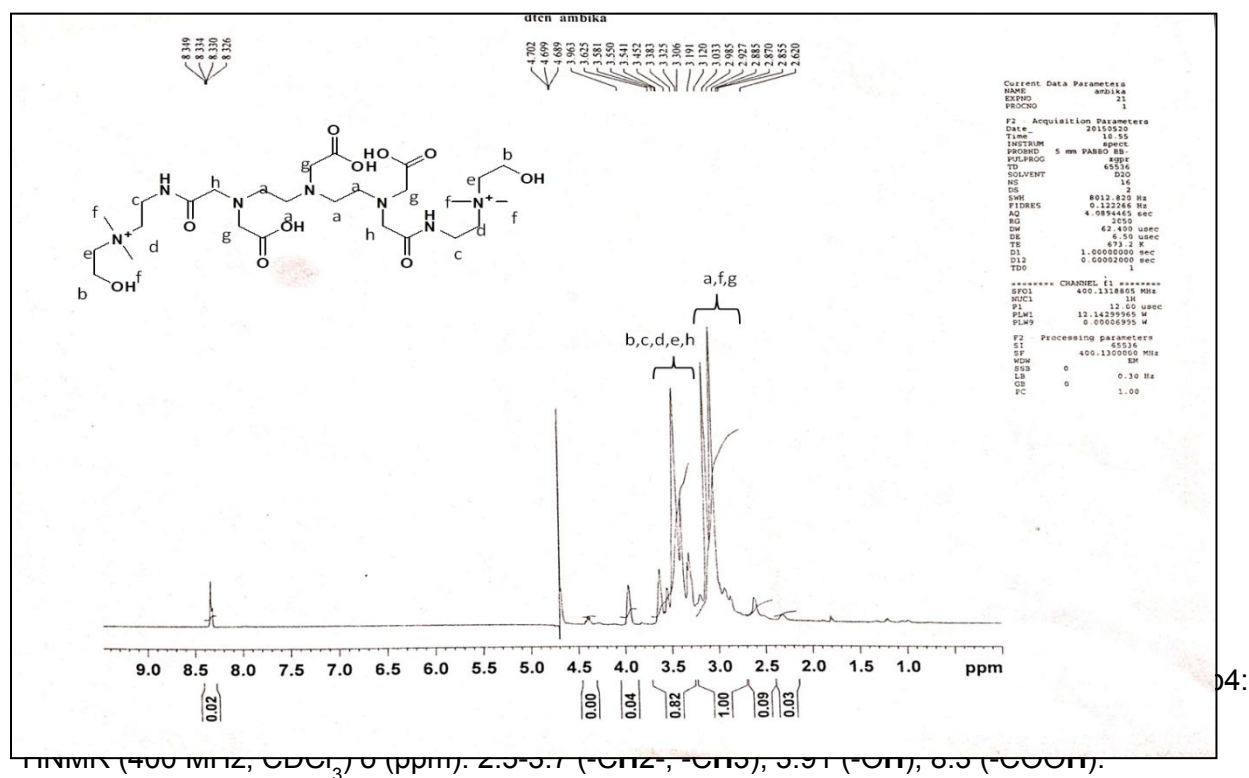

04:

**Figure S10:  $^{13}\text{C}$  Spectrum of 6,9,12-tris(carboxymethyl)-N1,N17-bis(2-hydroxyethyl)-N1,N1,N17,N17-tetramethyl-4,14-dioxo-3,6,9,12,15-pentaazaheptadecane-1,17-diaminium**

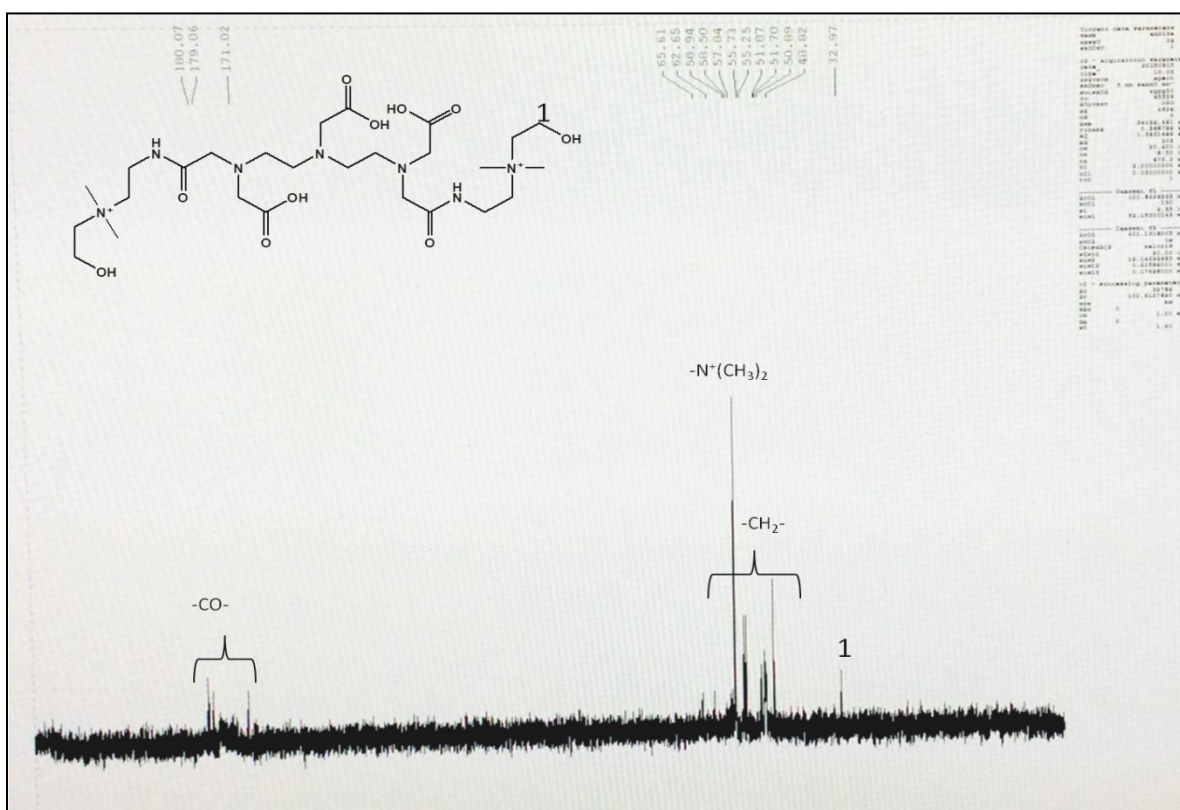

180 (-COOH).

**Figure S11 Mass Spectra of 6,9,12-tris(carboxymethyl)-N1,N17-bis(2-hydroxyethyl)-N1,N1,N17,N17-tetramethyl-4,14-dioxo-3,6,9,12,15-pentaazaheptadecane-1,17-diaminium**  
**a) LCMS Spectrum b) HRAMS Spectrum**

**a)**

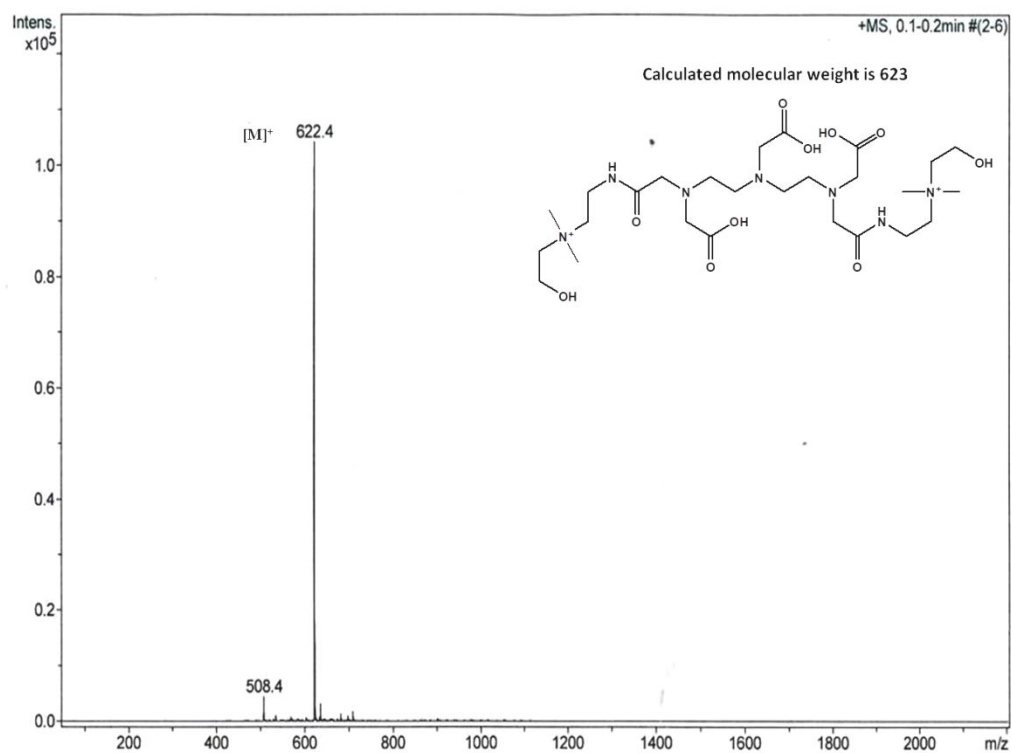

b)

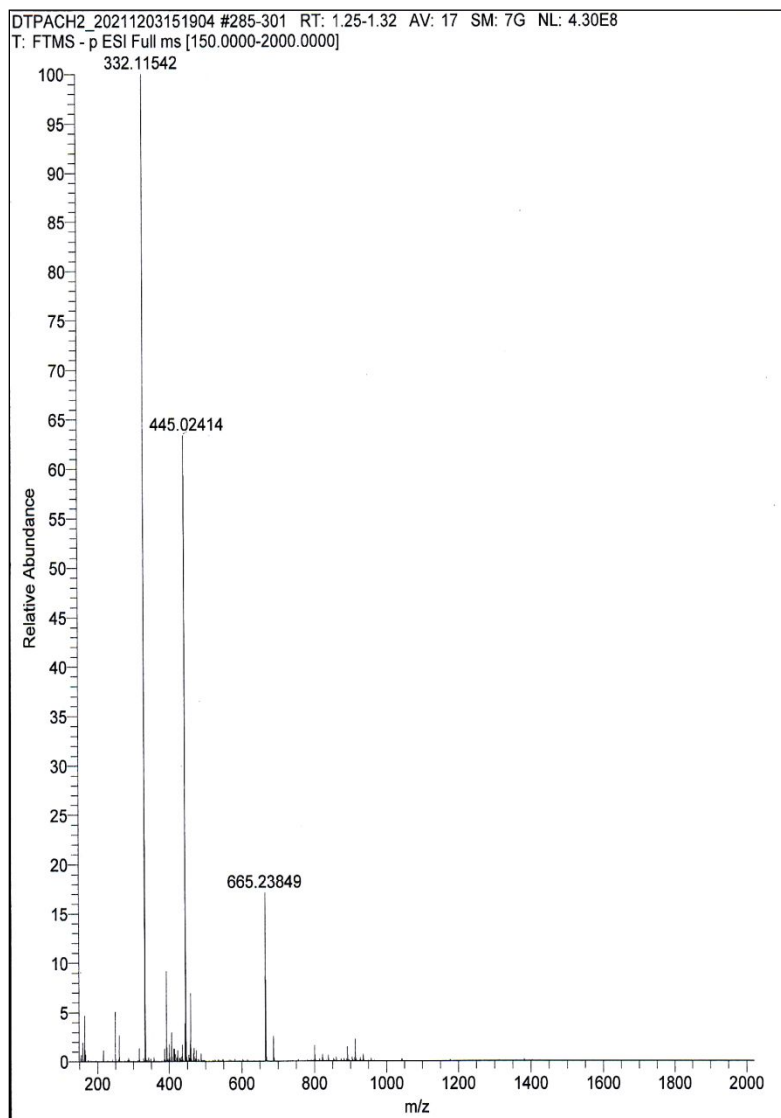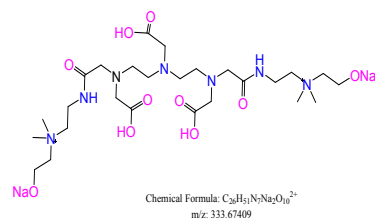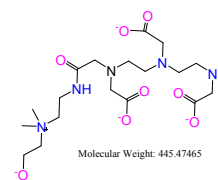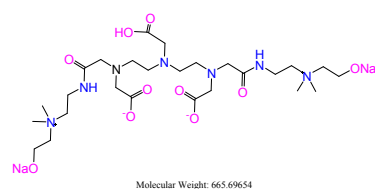

**Figure S12: HRMS spectra of Re- DTPA-bis(ChoEA) complex**

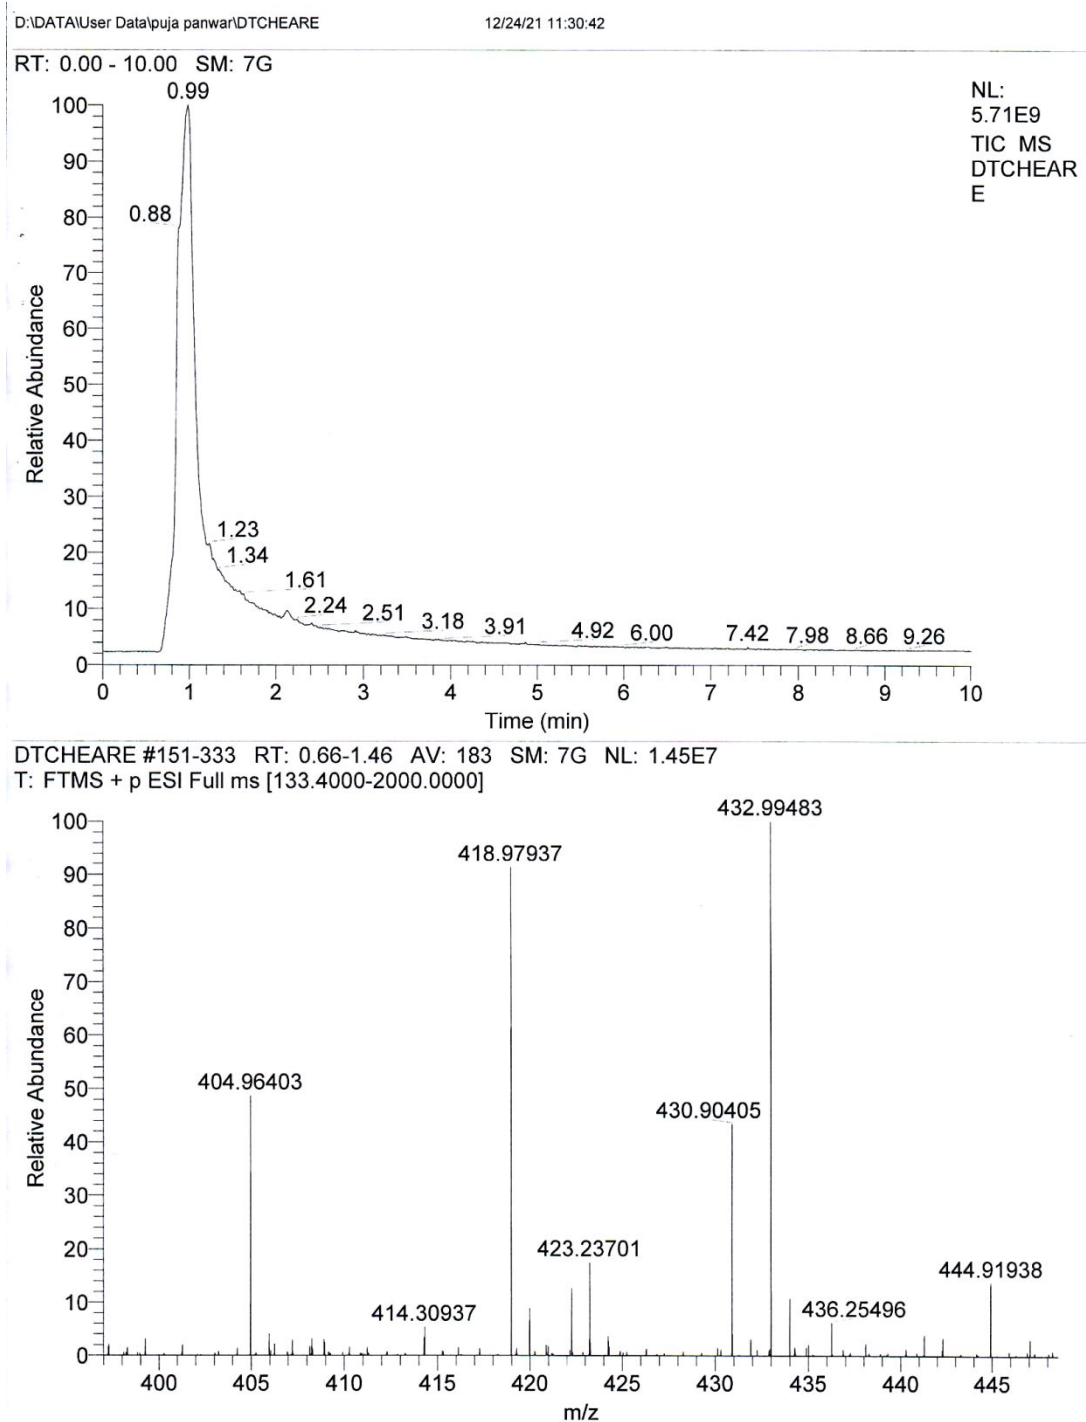

**TableS1: Table showing calculated and observed mass in HRMS spectra of plausible Re-DTPA-bis(ChoEA) Complex.**

|                                                                                                                                                                               |                  |
|-------------------------------------------------------------------------------------------------------------------------------------------------------------------------------|------------------|
| 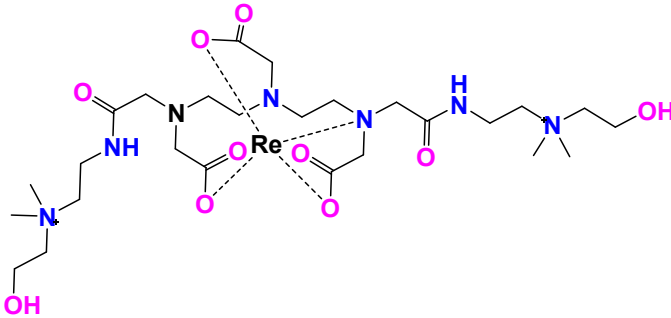 <p>Chemical Formula: <math>C_{26}H_{50}N_7O_{10}Re^{2+}</math><br/>m/z: 403.65828</p>       | Found: 404.96403 |
| 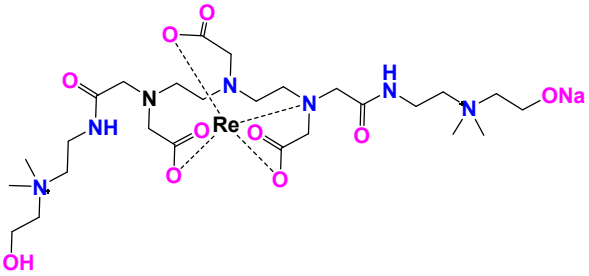 <p>Chemical Formula: <math>C_{26}H_{49}N_7NaO_{10}Re^{2+}</math><br/>m/z: 414.64926</p>    | Found: 414.30937 |
| 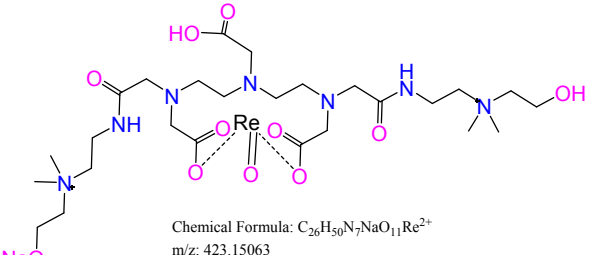 <p>Chemical Formula: <math>C_{26}H_{50}N_7NaO_{11}Re^{2+}</math><br/>m/z: 423.15063</p>   | Found: 423.23701 |
| 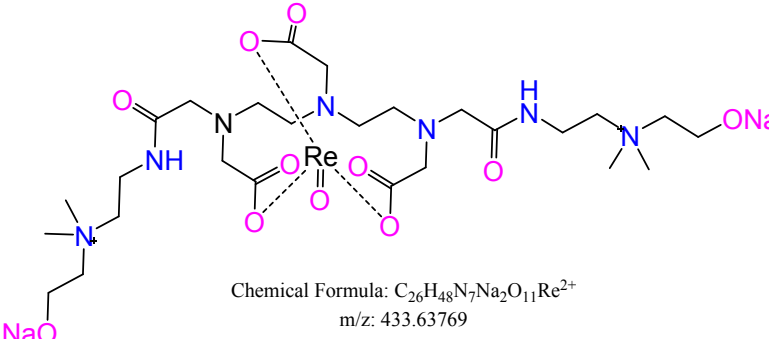 <p>Chemical Formula: <math>C_{26}H_{48}N_7Na_2O_{11}Re^{2+}</math><br/>m/z: 433.63769</p> | Found 432.99483  |

**Figure S13: IR spectra of a) DTPA-bis(ChoEA) b)Re-DTPA-bis(ChoEA) complex c) Overlay of IR Spectra**

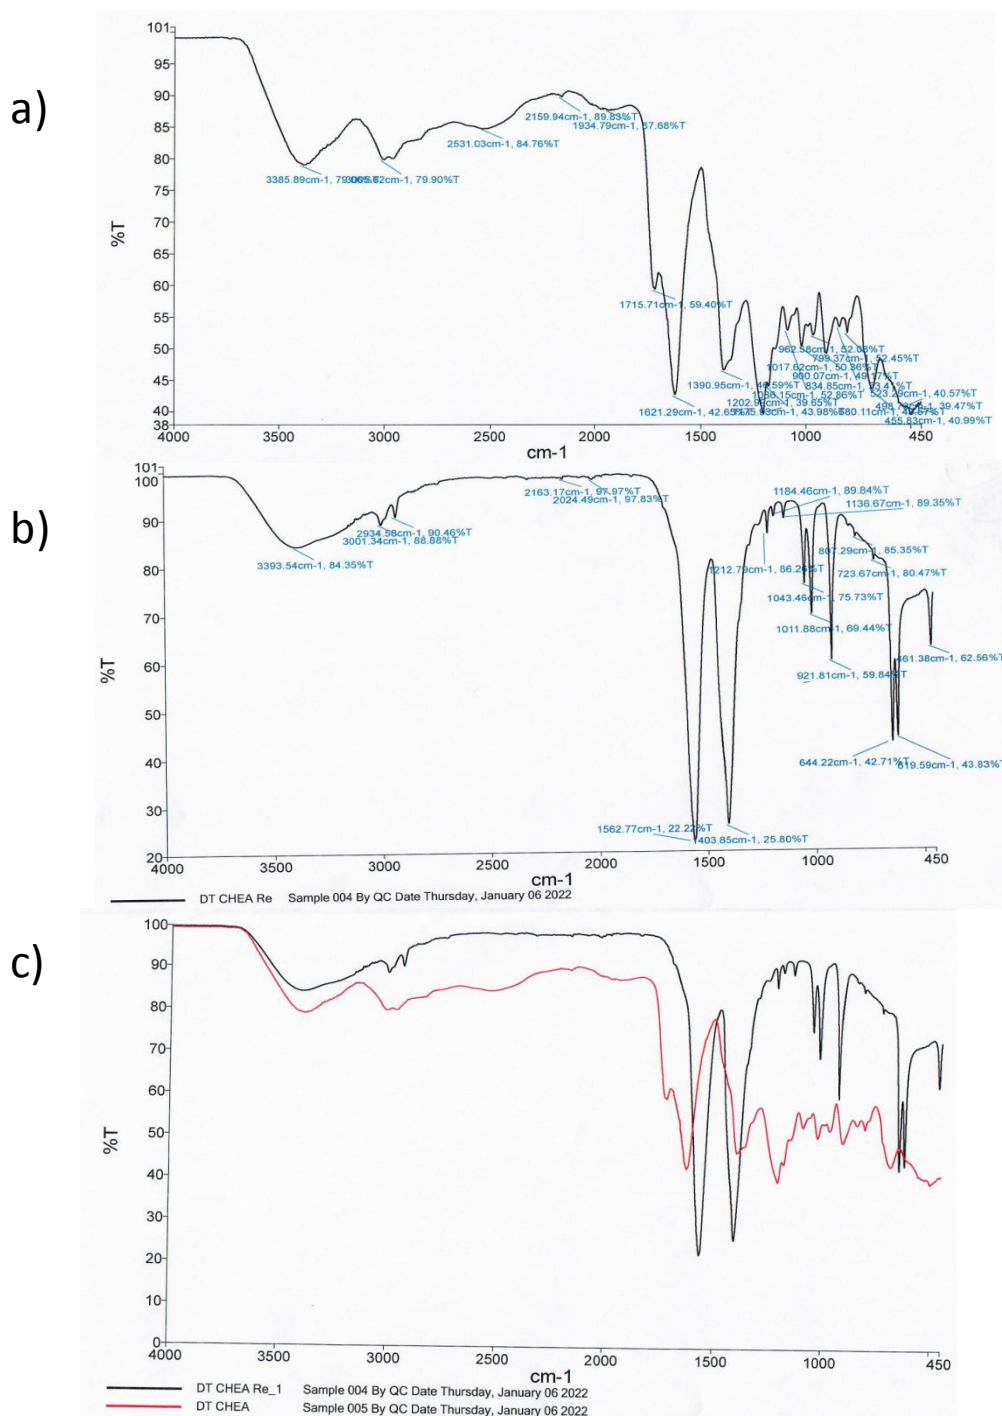

## Methods

### In vivo toxicity Assay

### 3-(4, 5-dimethylthiazol-2-yl)-2, 5-Diphenyltetrazolium Bromide (MTT) Assay/ Cell viability assay

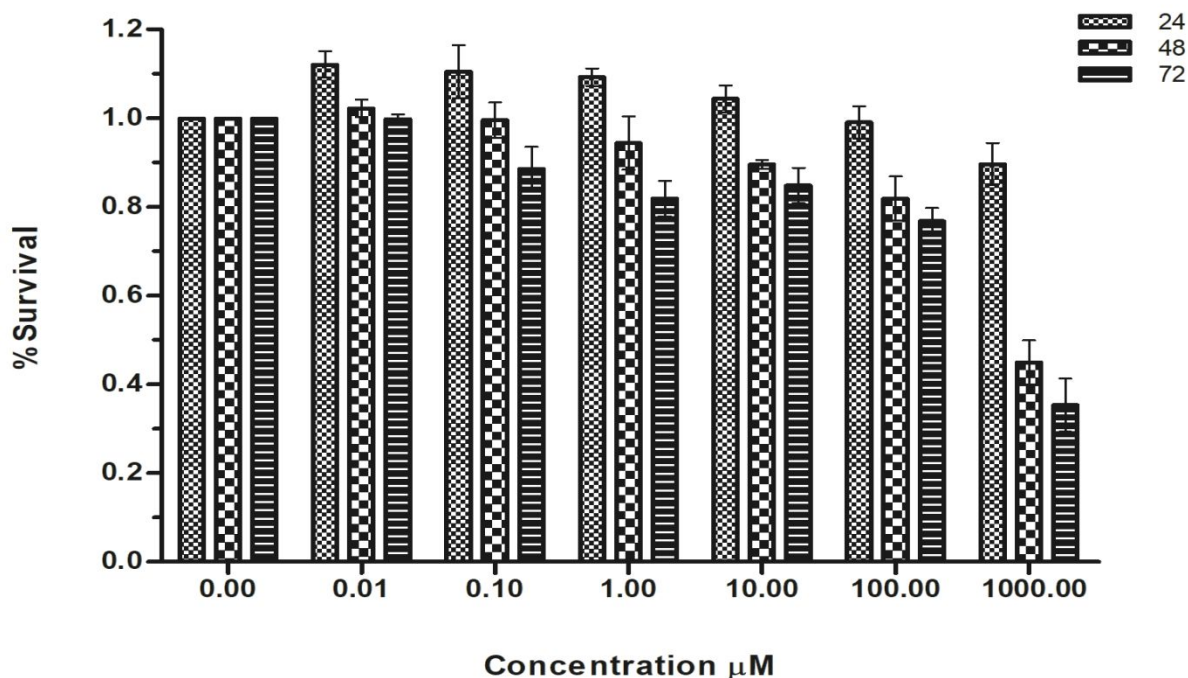

**Figure S14 Cytotoxicity evaluation of DTPA-bis(ChoEA) on HEK-293 cell line. Data is plotted for survival fraction versus concentration of compound for different time intervals.**

**Result:** Cell viability for DTPA-bis(ChoEA) was evaluated by calculating total cell surviving fraction for a range of concentrations (0.001μM-1000μM). Toxicity was evaluated for HEK-293 cell line for unlabeled compound. The derivative was not able to induce cytotoxicity at lower concentrations. Both time and concentration dependent toxicity in the form of time dependent bar graph are shown in supplementary file section 2.1. The conjugate was found to be relative less toxic up to 100 μM concentrations but a fall in cell survival was observed at higher

concentrations. The compound was observed to be non-toxic at 24 and 48 h at  $\leq 100\mu\text{M}$  concentration. A surviving fraction of  $0.81 \pm 0.05$  was observed at  $100\mu\text{M}$ , 48 h; with increasing treatment concentration to  $1000\mu\text{M}$ , 48 h surviving fraction observed was  $0.44 \pm 0.03$ . The compound did show toxicity at  $1000\mu\text{M}$  concentration at 48 and 72 h.  $\text{IC}_{50}$  was observed to be  $500\mu\text{M}$ .

### Radiolabeling and serum stability

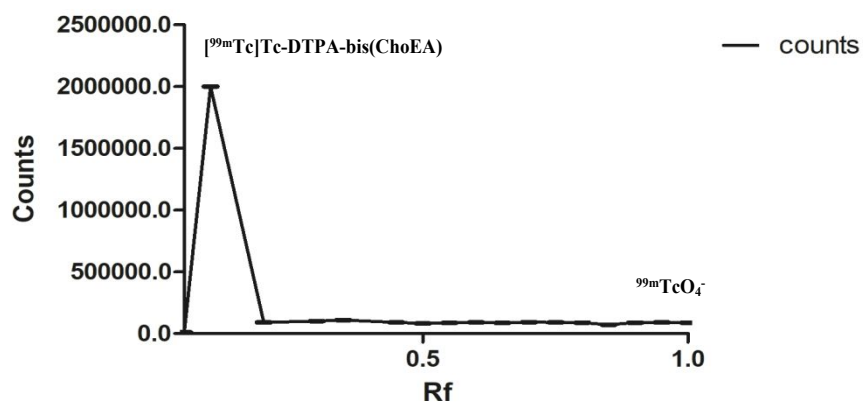

**FigureS15: Radiochromatogram showing formation of single species.**

**Result:** Radiolabeling yield of  $98.5 \pm 0.7\%$  was obtained within 30 minutes with minimal colloidal and hydrolyzed fraction.  $^{99\text{m}}\text{Tc}$  radiolabeling was carried out for DTPA-bis(ChoEA) at room temperature using  $\text{SnCl}_2$  as reducing agent at pH 7. More than 98% radiolabeling yield with minimal free, hydrolyzed and colloidal fraction was observed for DTPA-conjugate without purification.

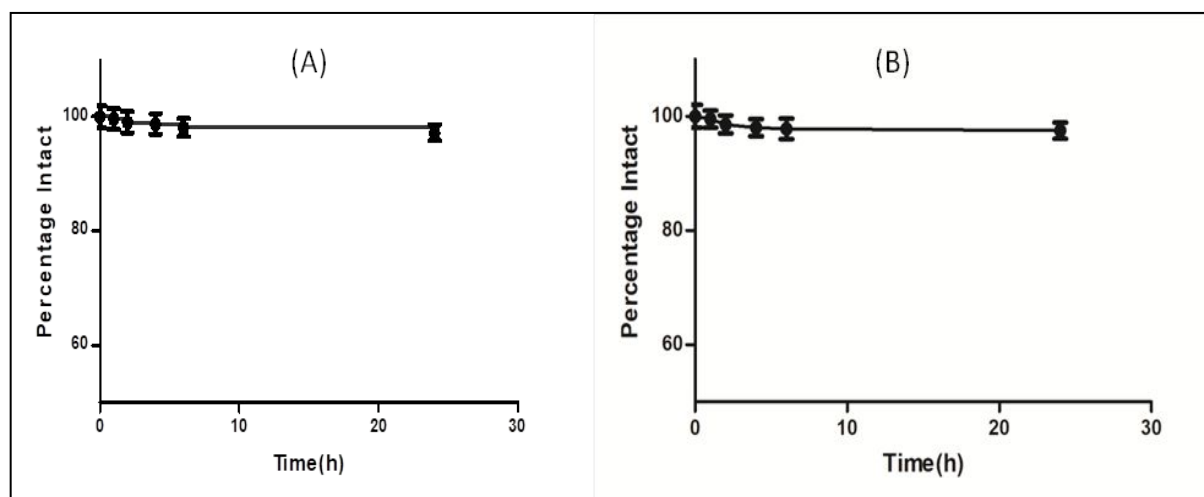

**Figure S16 Serum stability of  $[^{99m}\text{Tc}]\text{Tc-DTPA-bis(ChoEA)}$  (A) human serum (B) PBS**

**Result:** The radiolabeled DTPA-bis(ChoEA) showed high kinetic inertness under physiological conditions. Very slow degradation of the complex was observed at 24 h. Approximately 97% of the radioconjugate was found intact at 24 h both in human serum and PBS. The results were suggestive of minimal transcomplexation of the chelate.

### In Silico docking studies

The docking study was performed with autodockvina and was analysed using biovia discovery studio visualizer. Target molecule used was crystal structure of choline kinase complexed with phosphocholine (PDB id: 2ckq) with a resolution of 2.4 Å. The protein was prepared through autodock tools 4.2. The ligand energy minimization and 3D coordinates were generated through open Babel software. The best pose was generated rank based.

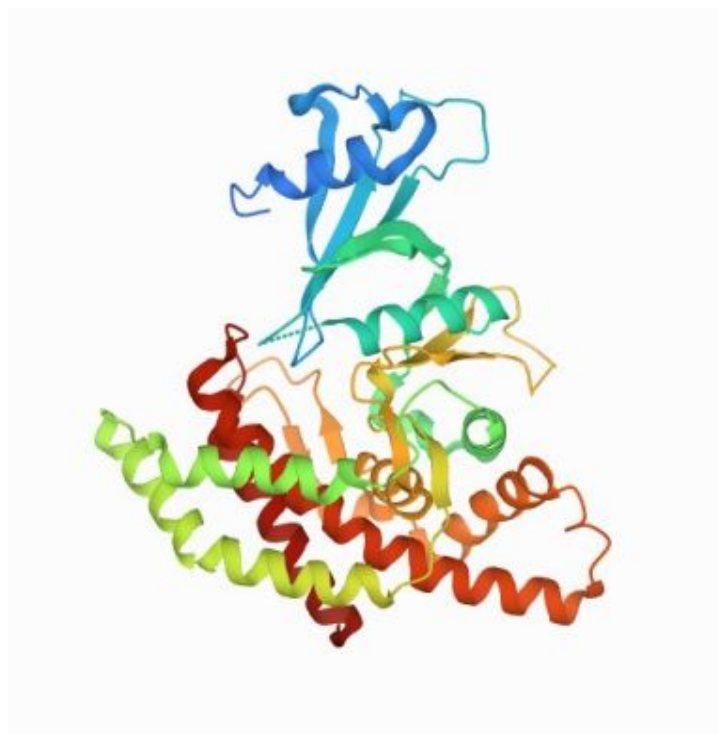

**Figure S17 3D Structure of choline kinase alpha (RCSB PDB:2ckq)**

| Ligand                            | Glide score (kcal/mol) | Hydrophobic interaction                                                | pi-stacking    | Hydrogen bond and salt bridge | Charged interaction |
|-----------------------------------|------------------------|------------------------------------------------------------------------|----------------|-------------------------------|---------------------|
| DTPA-bis-cholineethylamine        | -7.1                   | Trp423, Trp420, Asn311, Asp330, Arg444, Tyr354,                        | Gln308         | Ile116, Asn122, Leu120        | Glu349, Asp306      |
| Fluroethylcholine                 | -4.3                   | Gly119, Glu349, Tyr333, Tyr354, Trp420, Trp423, Tyr440,                | Gln308         | Ser121, Leu120                | Asp306              |
| 99m-Tc DTPA-bis-cholineethylamine | -6.1                   | Leu214, Arg213, Thr216, Tyr354, Ser355, Gly118,                        | Glu434, Glu357 | Gly119                        | Glu349, Asp353      |
| Choline                           | -3.7                   | Tyr333, Tyr354, Ser416, Trp423, Tyr440, Asn305, Cys307, Asn311, Glu349 | Gln308         | Ser121, Leu120,               | Asp306              |

Table S2 Table showing Glide Score and corresponding interactions of DTPA-bis-cholineethylamine , Fluoroethylcholine , [<sup>99m</sup>Tc]Tc-DTPA-bis(ChoEA), and Choline.

## Animal Toxicity studies

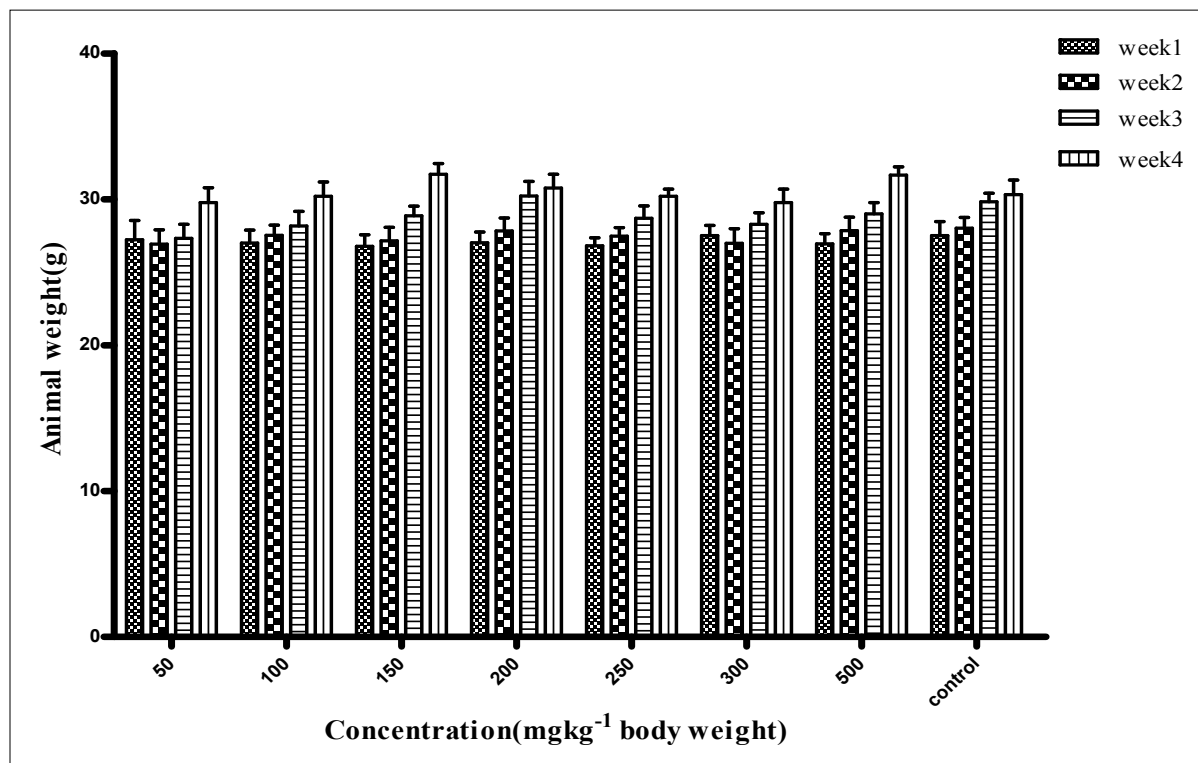

**FigureS18** Bar graph showing variation in animal weight with respect to varying concentrations of DTPA-bis(ChoEA) over a period of 4 weeks.

**Result:** It was observed that doses upto 500mg/kg body weights were well tolerated by subjects without any visible side effect such as tremors and death. No adverse effects such as weight loss or mortality were observed in all groups up to 4 weeks after intravenous administration of unlabeled conjugates. Long term toxicity was not evaluated.

## ROI Analysis of SPECT images

Semi quantitative volumetric VOI analyses were done using AMIRA software. The analyses were suggestive of high target to non-target ratio at the tumor site with minimal background activity.

| Ratio                 | PC3        | A549       | HCT116     |
|-----------------------|------------|------------|------------|
| Tumor to Muscle (T/M) | 36.57±4.51 | 29.90±5.13 | 34.21±5.02 |
| Tumor to Liver (T/L)  | 2.96±0.57  | 2.45±0.83  | 4.45±1.74  |

**Table S3. Table showing T/M, T/L values from PC3, A549, HCT116 imaging studies calculated by semiquantitative analysis of MicroSPECT images.**

**First in-human study of [ $^{99m}\text{Tc}$ ]Tc- DTPA-bis(ChoEA)**

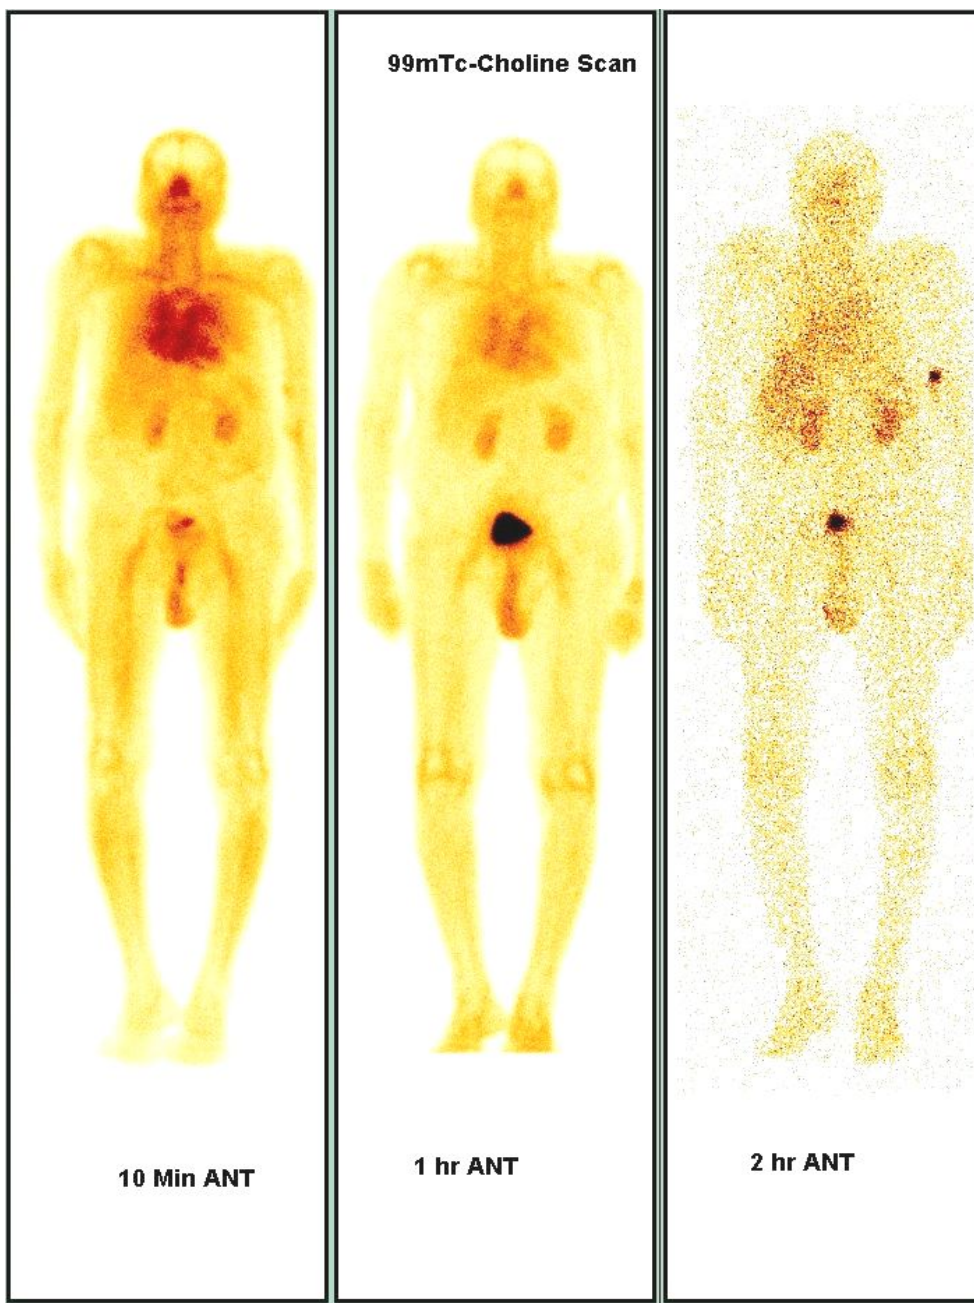

**Figure S19 First in-human clinical study in untreated subject of prostate cancer after intravenous injection of [ $^{99m}\text{Tc}$ ]Tc- DTPA-bis(ChoEA) without bladder irrigation.**

## Case report

Presented case is first in human whole body scan of [ $^{99m}\text{Tc}$ ]Tc-DTPA-bis(ChoEA) in 60 yr old patient. The patient had history of LUTS with Haematuria from one month. However the patient never had any trauma or fracture. The patient have not been subjected to any previous chemotherapy and radiotherapy. The PSA levels were 71.87ng/mL . Whole body SPECT images were acquired post 10 mCi injection of radiolabeled [ $^{99m}\text{Tc}$ ]Tc-DTPA-bis(ChoEA). Early 10 minute and delayed 1, 2 h anterior, posterior images were acquired. Maximum activity was observed in kidneys, liver, heart and no radioactivity was found in bone, neither in the bone marrow nor in the epiphysis in Whole body SPECT scan. The region of prostate appeared to be obscured by renal tracer activity.

The mean and standard deviation of the administered mass of DTPA-bis(ChoEA) was  $1.2 \pm 0.5$  mg (range, 1–5 mg; 0.016 mg/Kg Body weight). The mean administered activity was  $430 \pm 25$  MBq (range, 370-555 MBq). There were no adverse or clinically detectable pharmacologic effects in the subjects. No significant changes in vital signs or the results of laboratory studies or electrocardiograms were observed.
